# Supplementary material for: Characterization of FLOWERING LOCUS C Homologs in Apple as a Model for Fruit Trees
Source: Int J Mol Sci. 2020 Jun 26;21(12):4562. doi: 10.3390/ijms21124562 (PMC7348945; doi:10.3390/ijms21124562)
Supplement: Supplementary file 1 [file ijms-21-04562-s001.pdf]

**Table S1.** Primers used for cloning of cDNA encoding *MdFLC* and real-time PCR in apple.

| Primer   | Sequence                   |
|----------|----------------------------|
| MdMADSF  | CGGAATTCATGGNMGNGGNAARRT   |
| MdMADSR  | CGGGATCCACYTCNGCRTCRCANA   |
| MdFLC1aF | CTCTGAAAATGATTCAAAGTGATATG |
| MdFLC1aR | GCAACCTTTCTTGATCTTGTTT     |
| MdFLC1bF | CAAGGATGCTGGTGGTACTG       |
| MdFLC1bR | CACTGCAAACACATAATCAGACC    |
| MdFLC1cF | GACACGGACCAAACCAACTAAC     |
| MdFLC1cR | ATCTCGGTGAATCGAATCAGTT     |
| MdFLC3F  | TGGAGCGTTACCAGATGCATAG     |
| MdFLC3R  | GGTCTTGTGCCTCCCTACCA       |
| MdACTINF | ACTCGCATTGCTAGGGTTTC       |
| MdACTINR | ATACCACGCTTGGACTGAGC       |

**Table S2.** Primers used for transformation of *Arabidopsis* with *MdFLC3* cDNA and real-time PCR in transgenic *Arabidopsis*.

| Primer        | Sequence                                          |
|---------------|---------------------------------------------------|
| MdFLC3InsertF | GGATCCCCGGGTGGTCAGTCAAAA<br>TGGGGCGAGGGAAGGTAG    |
| MdFLC3InsertR | GCGCCAGGAGAGTTGTTGATTTATA<br>GTCGGAGGAAGTGCTCTGCT |
| AtFTF         | AGAGTTGAGATTGGTGGAGAAGAC                          |
| AtFTR         | CCAGTTGTAGCAGGGATATCAGTC                          |
| MdFLC3F       | TGGAGCGTTACCAGATGCATAG                            |
| MdFLC3R       | GGTCTTGTGCCTCCCTACCA                              |
| AtFLCF        | GCCTCCGGCAAGCTCTAC                                |
| AtFLCR        | TGATCCCACAAGATTATAAAG                             |
| AtACTINF      | ACATTGTGCTCAGTGGTGGA                              |
| AtACTINR      | GAGATCCAACATCTGCTGGAAT                            |

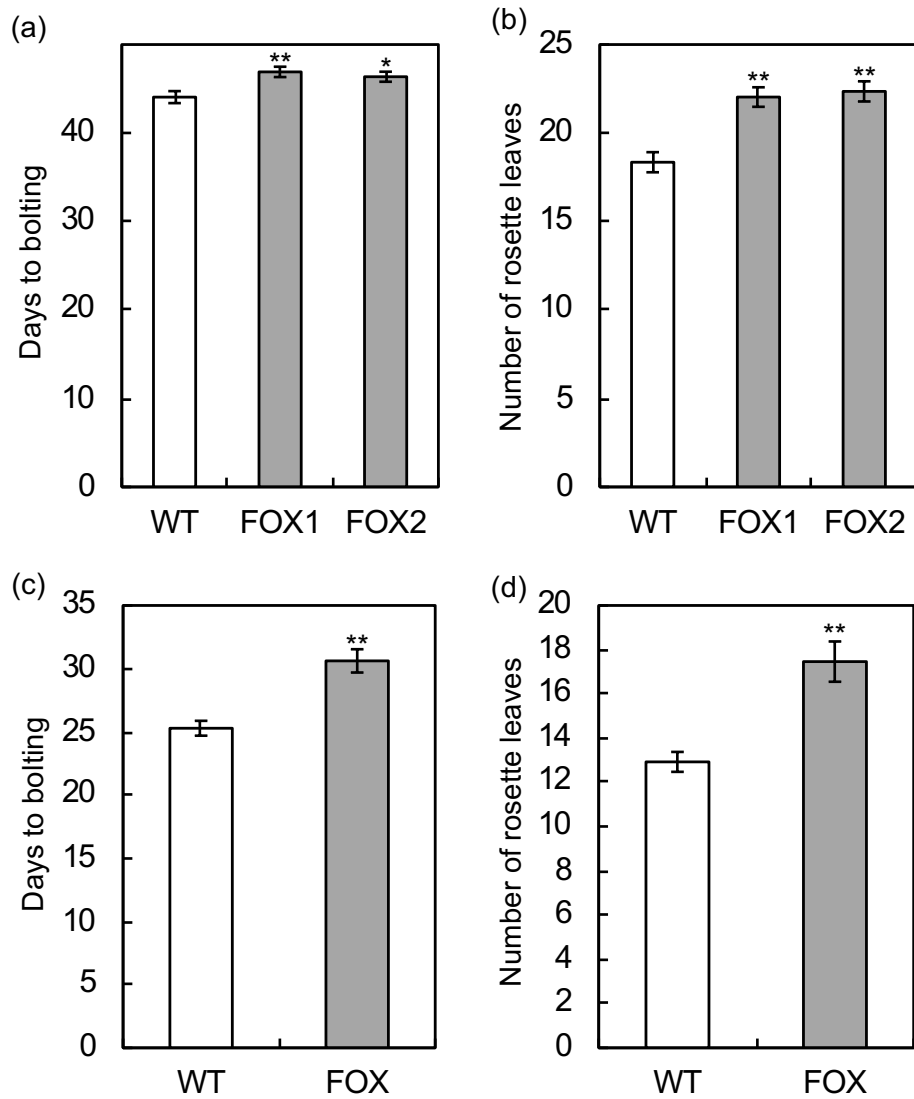

**Figure S1.** Phenotype analysis in the *MdFLC3* transgenic (FOX) and wild-type (WT) plants as support data for Figure 5. Days to bolting from sowing (a) and the number of rosette leaves at bolting time (b) in two FOX lines (n = 30 and 34) and WT (n = 20) plants in an experiment different from Figure 5. The values significantly differed between FOX and WT at  $P < 0.01$  (\*\*) and  $0.05$  (\*), according to the Dunnett test. Days to bolting from sowing (c) and the number of rosette leaves at bolting time (d) in FOX (n = 13) and WT (n = 14) plants. The values significantly differed between FOX and WT at  $P < 0.01$ ), according to the *t*-test.

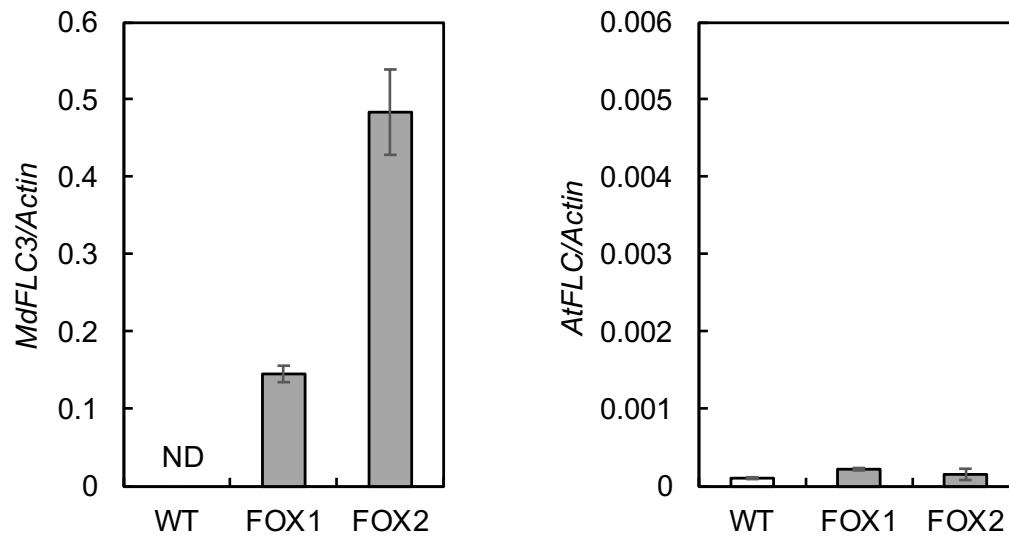

**Figure S2.** The expression levels of *MdFLC3* and *AtFLC* in the *MdFLC3* transgenic (FOX1, 2) and wild-type (WT) plants. The relative expression was determined from triplicate measurements of three independent biological replicates 15 days after sowing, and the relative expression levels were normalized against *AtACTIN* with standard errors. While a high expression of *MdFLC3* was observed in FOX plants, the expression of *AtFLC* was almost at the limit of detection in both FOX and wild-type plants.

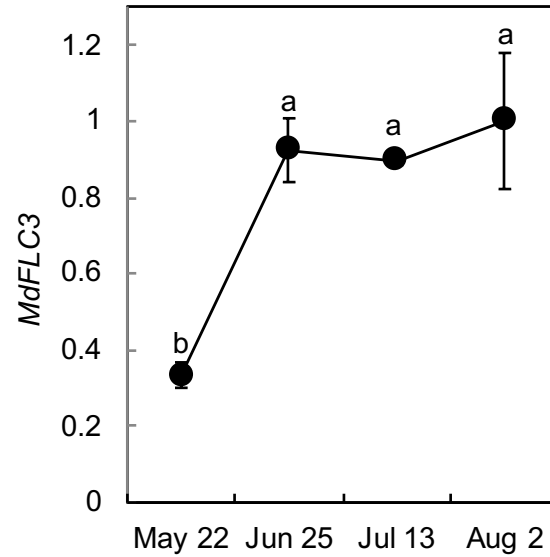

**Figure S3.** Seasonal changes in the expression levels of *MdFLC3* in the buds of adult trees. Total RNA was prepared for the expression analysis of *MdFLC3* on May 22, June 25, July 13, and August 2 in a different year than leaf expression in Figure 3. Relative expression was determined using triplicate measurements taken from three independent biological replicates. The relative expression levels were normalized against *GAPDH* with standard errors, and the maximum level of the transcripts was set at 1.0. The values for each gene significantly differed between days at  $P < 0.05$ , according to a Tukey test.
